# Supplementary material for: Melting Curve Analysis after T Allele Enrichment (MelcaTle) as a Highly Sensitive and Reliable Method for Detecting the JAK2V617F Mutation
Source: PLOS journal article supplement (doi:10.1371/journal.pone.0122003), 2015-03-20
Supplement: S2 (10.1371/journal.pone.0122003.s002) [file journal.pone.0122003.s002]

**S2 Fig.**

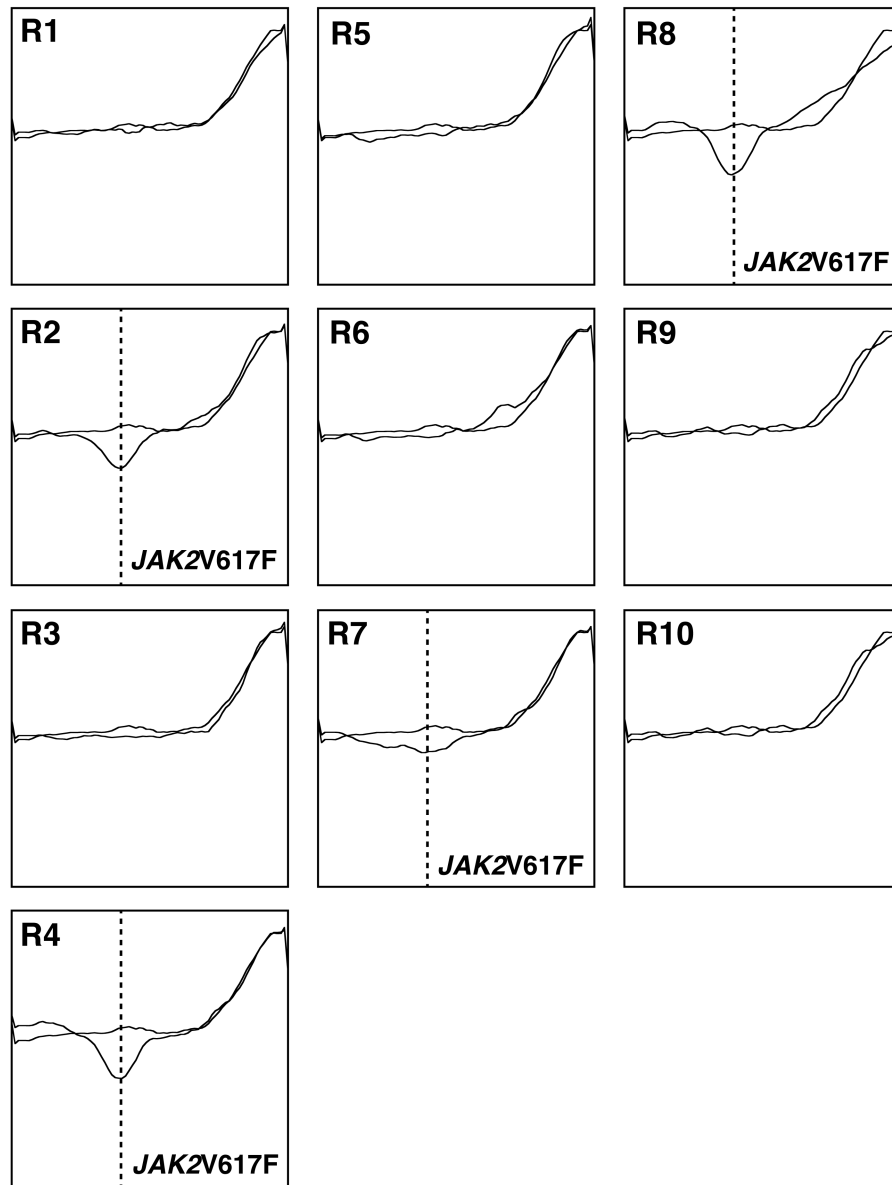

**S2 Fig. MelcaTle can detect nearly a single copy of the *JAK2V617F* mutant allele.**

Theoretically, 1/2 a copy of the *JAK2V617F* mutation per aliquot was used as the starting material. The experiment was performed in 10 replicates (R1 to R10). The relationship between the fluorescence intensity (y-axis) and temperature (x-axis) was plotted. Based on the P-values ( $<0.0001$ ) and the 99.9% confidence interval using the Tukey-Kramer test, 4 (R2, R4, R7, and R8) of the 10 replicates were identified as *JAK2V617F*-positive.
